# Supplementary material for: Farmers in the transition toward sustainability: what is the role of their entrepreneurial identity?
Source: Frontiers journal article supplement (doi:10.3389/fsufs.2023.1196824), 2023-09-19
Supplement: Data_Sheet_1.pdf [file Data_Sheet_1.pdf]

## **APPENDIX A. QUESTIONNAIRE EXAMINED IN THE ARTICLE**

### **Section 1 - General information.**

1. Please, indicate your age
2. Please, indicate your gender
  - Male
  - Female
3. Please, indicate your Educational level:
  - Elementary School
  - Middle School diploma
  - Professional diploma
  - High school diploma
  - Bachelor degree
  - Master degree
  - MSc
  - PhD
4. Do you work in your farm full time or part time?
  - Part-time
  - Full-time
5. How many years have you been working in the agricultural sector?
6. Farm Utilized Agricultural Area (UAA) (hectars):
7. What certifications does your farm currently have?
  - ISCC+
  - Organic
  - GlobalGAP
  - No certification
  - Other, specify:
8. Are you part of a producer organisation, cooperative, consortium or farmers' association?
  - Yes
  - No

## **Section 2 – Contracts**

9. Do you currently sell one or more of your products by signing a cultivation and/or pre-sowing contract?
- Yes
  - No
10. Have you formally signed a contract to participate in the Carta del Mulino programme?
- Yes
  - No

## **Section 3 - Agricultural practices and crop management**

11. Have you ever adopted crop rotation (e.g. with oilseed/legumes)?
- Yes
  - No
12. Have you ever adopted intercropping (multiple crops planting)?
- Yes
  - No
13. Have you ever adopted green manure?
- Yes
  - No
14. Have you ever adopted flower strip?
- Yes
  - No
15. Have you ever adopted Minimum or zero tillage?
- Yes
  - No
16. Have you ever adopted avoidance of using glyphosate?
- Yes
  - No

## Section 4 – Attitudes

17. Please consider the following statement carefully. You can respond with: "I totally disagree", "I somewhat disagree", "I neither agree nor disagree", "I somewhat agree", "I totally agree".

| No. | Do you agree or disagree that:                                                                                                            | I totally disagree | I somewhat disagree | I neither agree nor disagree | I somewhat agree | I totally agree |
|-----|-------------------------------------------------------------------------------------------------------------------------------------------|--------------------|---------------------|------------------------------|------------------|-----------------|
| 1.  | If I do something for the environment just as a single person, it will have no effect                                                     |                    |                     |                              |                  |                 |
| 2.  | Since other farmers already contribute to sustainable crop productions, my contribution is not relevant                                   |                    |                     |                              |                  |                 |
| 3.  | The best way to solve environmental problems is to act collectively.                                                                      |                    |                     |                              |                  |                 |
| 4.  | Forming an association with other farmers to contribute to environmental improvement is just a waste of time                              |                    |                     |                              |                  |                 |
| 5.  | For me, participating in collective actions related to the realization of a sustainable supply chain is important to help the environment |                    |                     |                              |                  |                 |
| 6.  | My family and friends would be proud of me if I contributed to the realization of a sustainable supply chain                              |                    |                     |                              |                  |                 |
| 7.  | If I see an opportunity, I am always willing to try new practices and techniques                                                          |                    |                     |                              |                  |                 |
| 8.  | I always look for opportunities to try something new.                                                                                     |                    |                     |                              |                  |                 |
| 9.  | I am not willing to experiment with new crops.                                                                                            |                    |                     |                              |                  |                 |
| 10. | If I see an opportunity to increase profits, I am always willing to take risks.                                                           |                    |                     |                              |                  |                 |
| 11. | I would rather maintain current crops than replace them with ones I don't know.                                                           |                    |                     |                              |                  |                 |
| 12. | If I can't be sure of the benefits, I am not willing to invest in my business.                                                            |                    |                     |                              |                  |                 |
| 13. | I am willing to start activities that other farmers are not yet doing.                                                                    |                    |                     |                              |                  |                 |
| 14. | I am always looking for new connections to access inputs, funding, and new markets.                                                       |                    |                     |                              |                  |                 |
| 15. | It is hard to analyse market trends and therefore set my business strategies.                                                             |                    |                     |                              |                  |                 |

**\*STATA code - Farmers in the transition towards sustainability: what is the role of their entrepreneurial identity?**

**\* Eleonora Sofia Rossi, Valentina C. Materia, Francesco Caracciolo, Emanuele Blasi, Stefano Pascucci**

```
use data2022.dta, clear
```

```
* section 1 of the survey *
```

```
ren v1 age  
ren v2 gender  
ren v3 educ8  
ren v4 full_time  
ren v5 experience  
ren v6 land_size  
gen certification = 0  
replace certification = 1 if v7 != 3  
ren v8 coop
```

```
* section 2 of the survey *
```

```
gen contract = 0  
replace contract = 1 if v9 == 1  
replace contract = 2 if v9 == 1 & v10 == 1
```

```
* section 3 of the survey *
```

```
ren v11 rotation  
ren v12 intercropping  
ren v13 manure  
ren v14 flower  
ren v15 minimumtillage  
ren v16 nogliphos
```

```
egen practices = rowtotal(rotation intercropping manure flower minimumtillage nogliphos)
```

```
* section 4 of the survey *
```

```
alpha v17_1 v17_2 v17_3 v17_4 v17_5 v17_6, item std gen(collective)  
alpha v17_7 v17_8 v17_9, item std gen(innovative)  
alpha v17_10 v17_11 v17_12, item std gen(risk_taking)  
alpha v17_13 v17_14 v17_15, item std gen(proactive)
```

```
** generate new variables
```

```
gen ln_land = ln(land_size)  
gen age2 = age^2
```

```
gen educ3 = 0  
replace educ3 = 1 if educ8 > 3  
replace educ3 = 2 if educ8 > 4
```

```
*poisson regression
```

```
poisson practices gender age age2 educ3 full_time coop experience ln_land certification innovative  
risk_taking proactive collective, robust
```

```
*mprobit
```

```
mprobit contract practices gender age age2 educ3 full_time coop experience ln_land certification innovative  
risk_taking proactive collective, base(0) robust
```
